# Supplementary material for: Shared inflammatory pathways and therapeutic strategies in COVID-19 and cancer immunotherapy
Source: PubMed Central journal article supplement — J Immunother Cancer. 2021 May 13;9(5):e002392. doi: 10.1136/jitc-2021-002392 (PMC8126446; doi:10.1136/jitc-2021-002392), 2021-05-13
Supplement: jitc-2021-002392supp001.pdf [file jitc-2021-002392supp001.pdf]

Supplement 1: Clinical trials on *clinicaltrials.gov*

As of **3/22/2021**

5113 Studies found for: "Covid19"

| Terms                                           | Search Results* | Entire Database** |
|-------------------------------------------------|-----------------|-------------------|
| Synonyms                                        |                 |                   |
| <b>covid19</b>                                  | 5,113 studies   | 5,113 studies     |
| COVID                                           | 5,032 studies   | 5,032 studies     |
| SARS-CoV-2                                      | 1,685 studies   | 1,685 studies     |
| severe acute respiratory syndrome coronavirus 2 | 171 studies     | 171 studies       |
| 2019-nCoV                                       | 47 studies      | 47 studies        |
| 2019 novel coronavirus                          | 44 studies      | 44 studies        |
| Wuhan coronavirus                               | 1 studies       | 1 studies         |

2878 Studies found for: "covid19" & "interventional"

382 studies found for: "Covid19" & "completed" & "interventional"

immunomodulatory and inflammatory drugs

"COVID19" & "interventional" &:

- Tocilizumab: (38) 8 completed, 4 terminated, 0 suspended
- Anakinra: (14) 2 completed, 3 terminated (Anakinra & Rux, Anakinra & Emapalumab), 1 suspended
- Defibrotide: (4) 0 completed, 0 terminated, 0 suspended
- Eculizumab: (1) 0 completed
- Infliximab: (1) 1 completed
- Ruxolitinib: (16) 1 completed, 2 terminated, 0 suspended
- Sarilumab: (9) 3 completed, 0 terminated, 1 suspended
- Baricitinib: (9) 1 completed, 0 terminated, 0 suspended
- monoclonal antibody: (33) 1 completed, 1 terminated, 0 suspended

- 5 studies include biologics- Pamrevlumab, Emapalumab & Anakinra, Bamlanivimab, Lezilumab, and Gimsilumab
- Interleukin: (20) 1 completed, 3 terminated (Anakinra & Rux, Anakinra & Emapalumab), 0 suspended
  - 11 without previous interventional drugs listed
  - IL-7, IL-6, IL-8
  - One study looked at Naltrexone and Ketamine- not included
  - One study used a Device: Extracorporeal blood purification using the oXiris® (AN69ST) hemofilter- not included
- "COVID19" & "interventional" &: cell therapy: (58) 4 completed, 0 terminated, 0 suspended
  - "COVID19" & "interventional" &: (CAR) T: 0
  - "COVID19" & "interventional" &: NK cell: 6
  - "COVID19" & "interventional" &: Mesenchymal stem cell: (49) 5 completed
  - "COVID19" & "interventional" &: TCR: 0
- "COVID19" & "interventional" &: dexamethasone: (21) 2 completed, 2 terminated, 0 suspended
- "COVID19" & "interventional" &: adoptive cell therapy: (2) 0 completed
- "COVID19" & "interventional" &: Beigelomab: (0)
